# Supplementary material
Source: Research Square preprint supplement (doi:10.21203/rs.3.rs-8986811/v1)
Supplement: Supplementary file 1 [file 2e9543f06e9a450b72bc11b4.doc]

**Supplementary material**

**M1 Macrophage-Derived Exosomal miR-155-5p Exacerbates Aortic Dissection Progression via SMAD5-Mediated Regulation of Vascular Smooth Muscle Cell Phenotype**

Dengwei Cao1,2,3,#, Xinyi Li2,5,#, Shaoping Zhu 1,2,3,#, Jianfeng Chen 1,2,3, Haoxiang Li 1,2,3, Jiajun Shi 1,2,3, Xiaoqi Xiong 1,2,3, Jiahui Liu 1,2,3, Yumou Wang 1,2,3, Zhe Dong1,2,3,*, Jinping Liu 1,2,3,4*

1Department of Cardiovascular Surgery, Zhongnan Hospital of Wuhan University, Wuhan 430071, China;2Hubei Provincial Engineering Research Center of Minimally Invasive Cardiovascular Surgery, Wuhan 430071, China;3Wuhan Clinical Research Center for Minimally Invasive Treatment of Structural Heart Disease, Wuhan 430071, China;4State Key Laboratory of Metabolism and Regulation in Complex Organisms;5Department of Anesthesiology, Zhongnan Hospital of Wuhan University, Wuhan, Hubei, China.430071.

**# Dengwei Cao, Xinyi Li and Shaoping Zhu contributed equally to this work**

***Running title***: M1 macrophage exosomal miR-155-5p promotes aortic dissection

**#Address correspondence to:**

Jinping Liu (MD, PhD) and Zhe Dong (MD, PhD)

Department of Cardiovascular Surgery, Zhongnan Hospital of Wuhan University, 169 Donghu Road, Wuhan 430071, P.R. China

**Email:**

Zhe Dong [dongzhet0421123@163.com](mailto:dongzhet0421123@163.com)

Jinping Liu [liujinping@znhospital.cn](mailto:liujinping@znhospital.cn)

Tel: 027-67812888

Jinping Liu：0000-0002-9384-4880

**1.Appendix A. Supplementary data**

The following is the Supplementary data to this article.

**Supplemental Data**

**Supplemental Fig. 1**


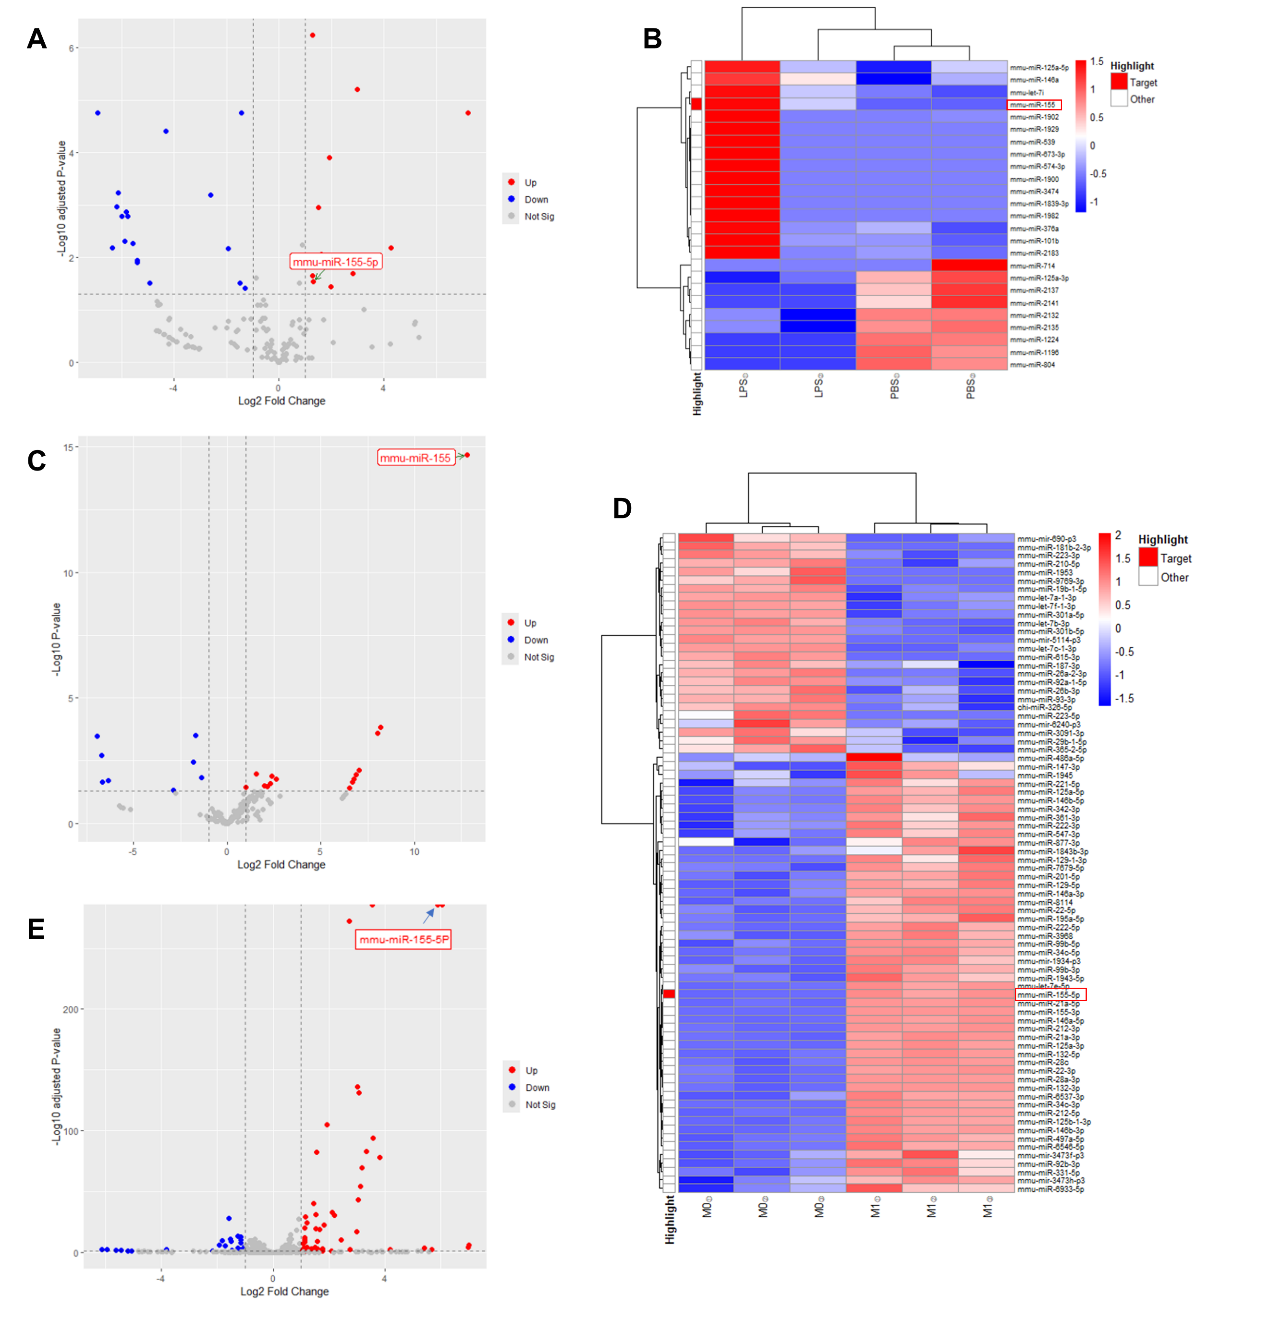


**Fig. S1. miR-155-5p enrichment in macrophages (RAW264.7 and BMDMs) and macrophage-derived exosomes. A.** Volcano plot of differentially expressed miRNAs in exosomes from M1- versus M0-polarized RAW264.7 macrophages (red: upregulated, blue: downregulated, gray: not significant; log2 fold change threshold |log2FC| ≥ 1, P < 0.05; miR-155-5p highlighted in red). **B.** Heatmap of significantly altered miRNAs in BMDMs (GSE125171) identified by miRNA sequencing. **C.** Volcano plot of differentially expressed miRNAs in BMDMs (GSE125171; criteria as in A; miR-155-5p highlighted). **D.** Heatmap of significantly altered miRNAs in RAW264.7 cells from miRNA sequencing data. (E) Volcano plot illustrating miRNAs differentially expressed in RAW264.7 cells.

**Supplemental Fig. 2**


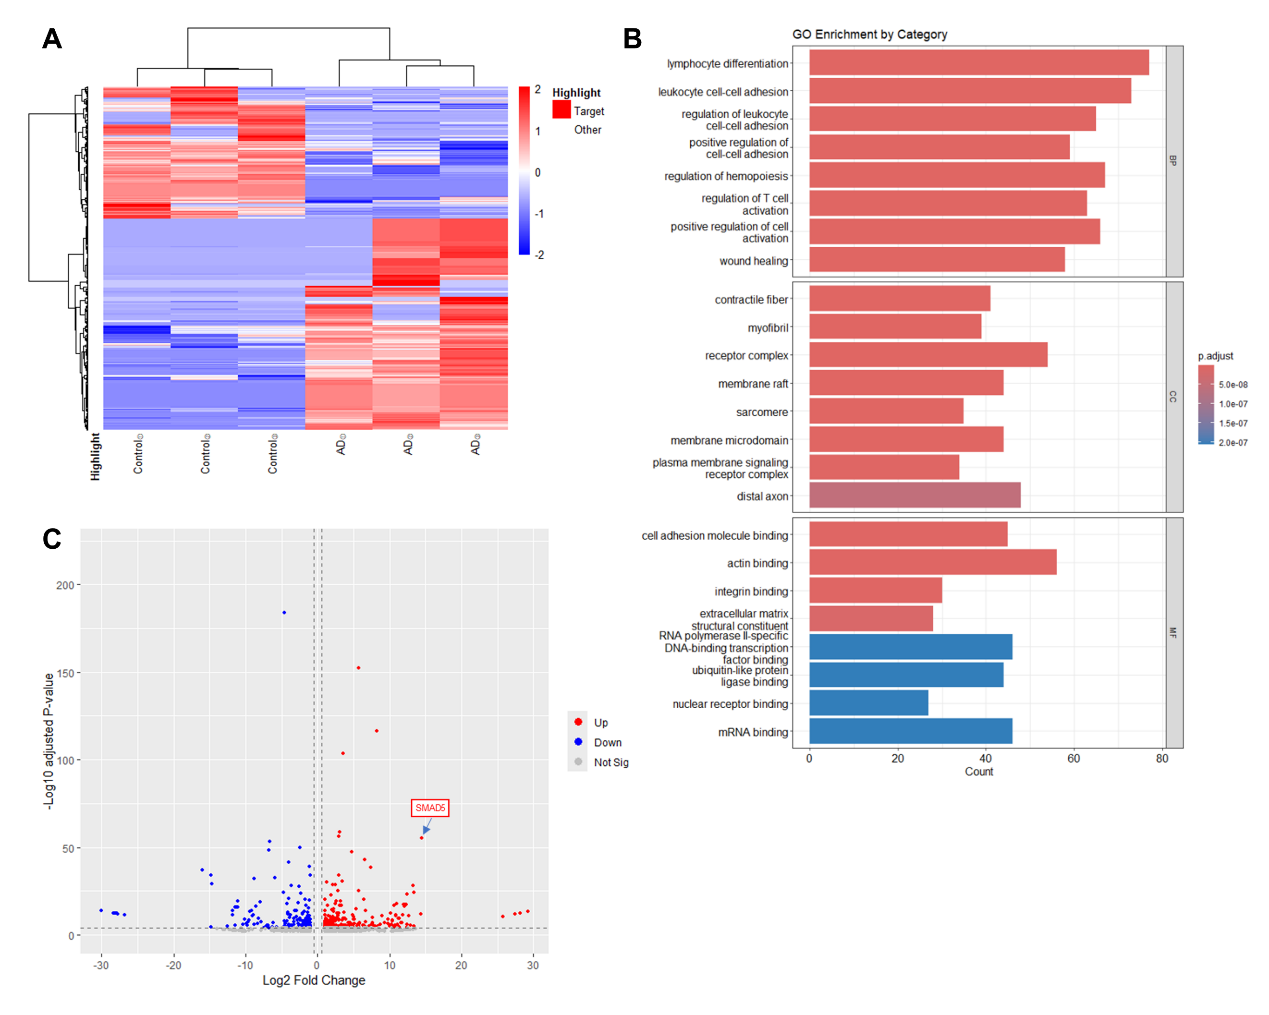


**Fig. S2. Differential expression of SMAD5 in human AD. A.** Heatmap showing RNAs differentially expressed in aortic tissues from AD patients compared with control individuals via RNA sequencing. **B.** Gene Ontology (GO) analysis of genes differentially expressed between AD and control groups. **C.** Volcano plot depicting mRNAs differentially expressed between AD and control aortic tissues.

**Supplemental Fig. 3**


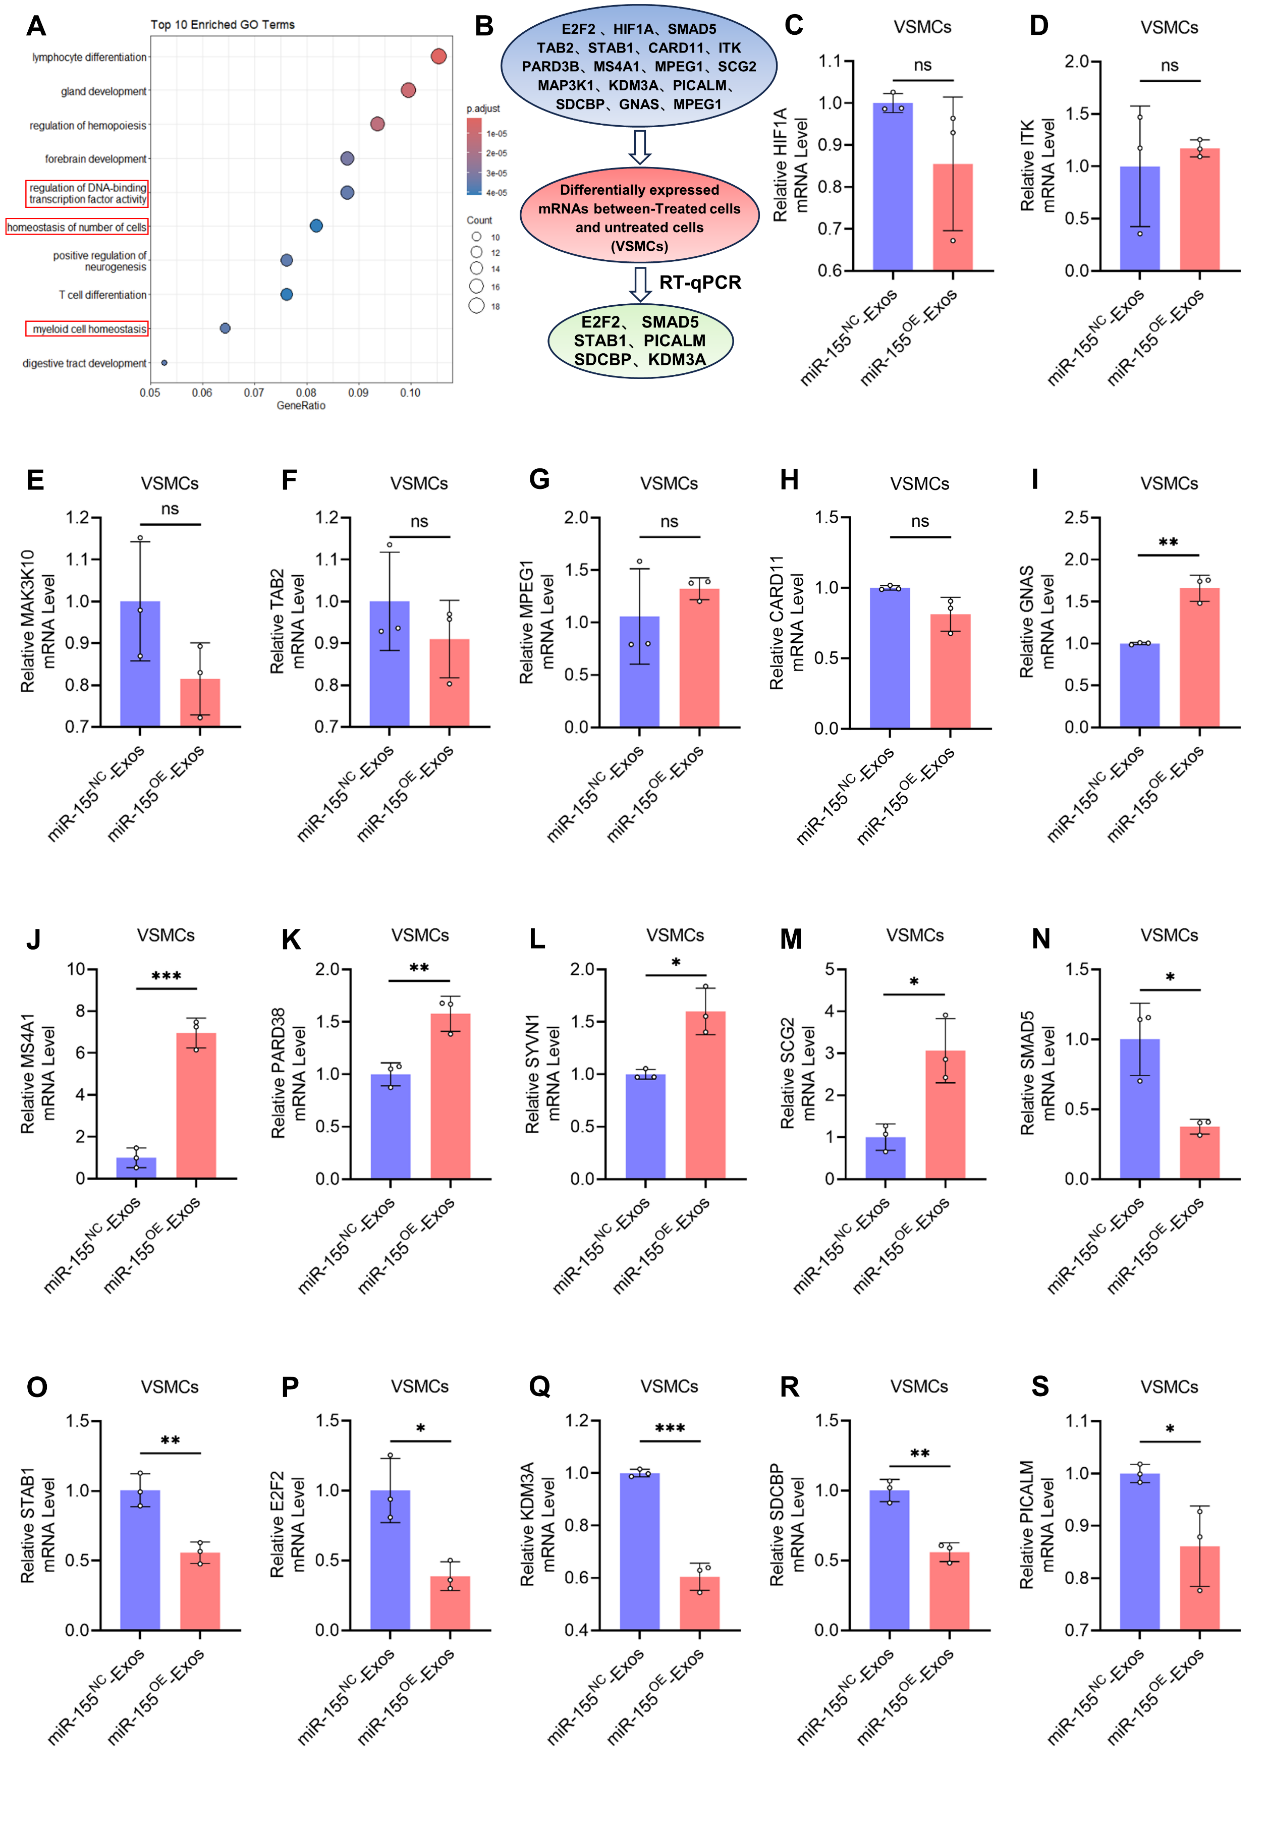


**Fig. S3. Identification of miR-155-5p downstream target genes in VSMCs. A.** KEGG analysis of predicted miR-155-5p target genes. **B.** Workflow schematic illustrating the screening of miR-155-5p target genes in VSMCs. **C-S.** qRT-PCR analysis showing mRNA expression of predicted target genes (HIF1A (C), ITK (D), MAP3K10 (E), TAB2 (F), MPEG1 (G), CARD11 (H), GNAS (I), MS4A1 (J), PARD3B (K), SYVN1 (L), SCG2 (M), SMAD5 (N), SATB1 (O), E2F2 (P), KDM3A (Q), SDCBP (R), and PICALM (S)) in VSMCs overexpressing miR-155-5p (n = 3/group).

**Supplemental Fig. 4**


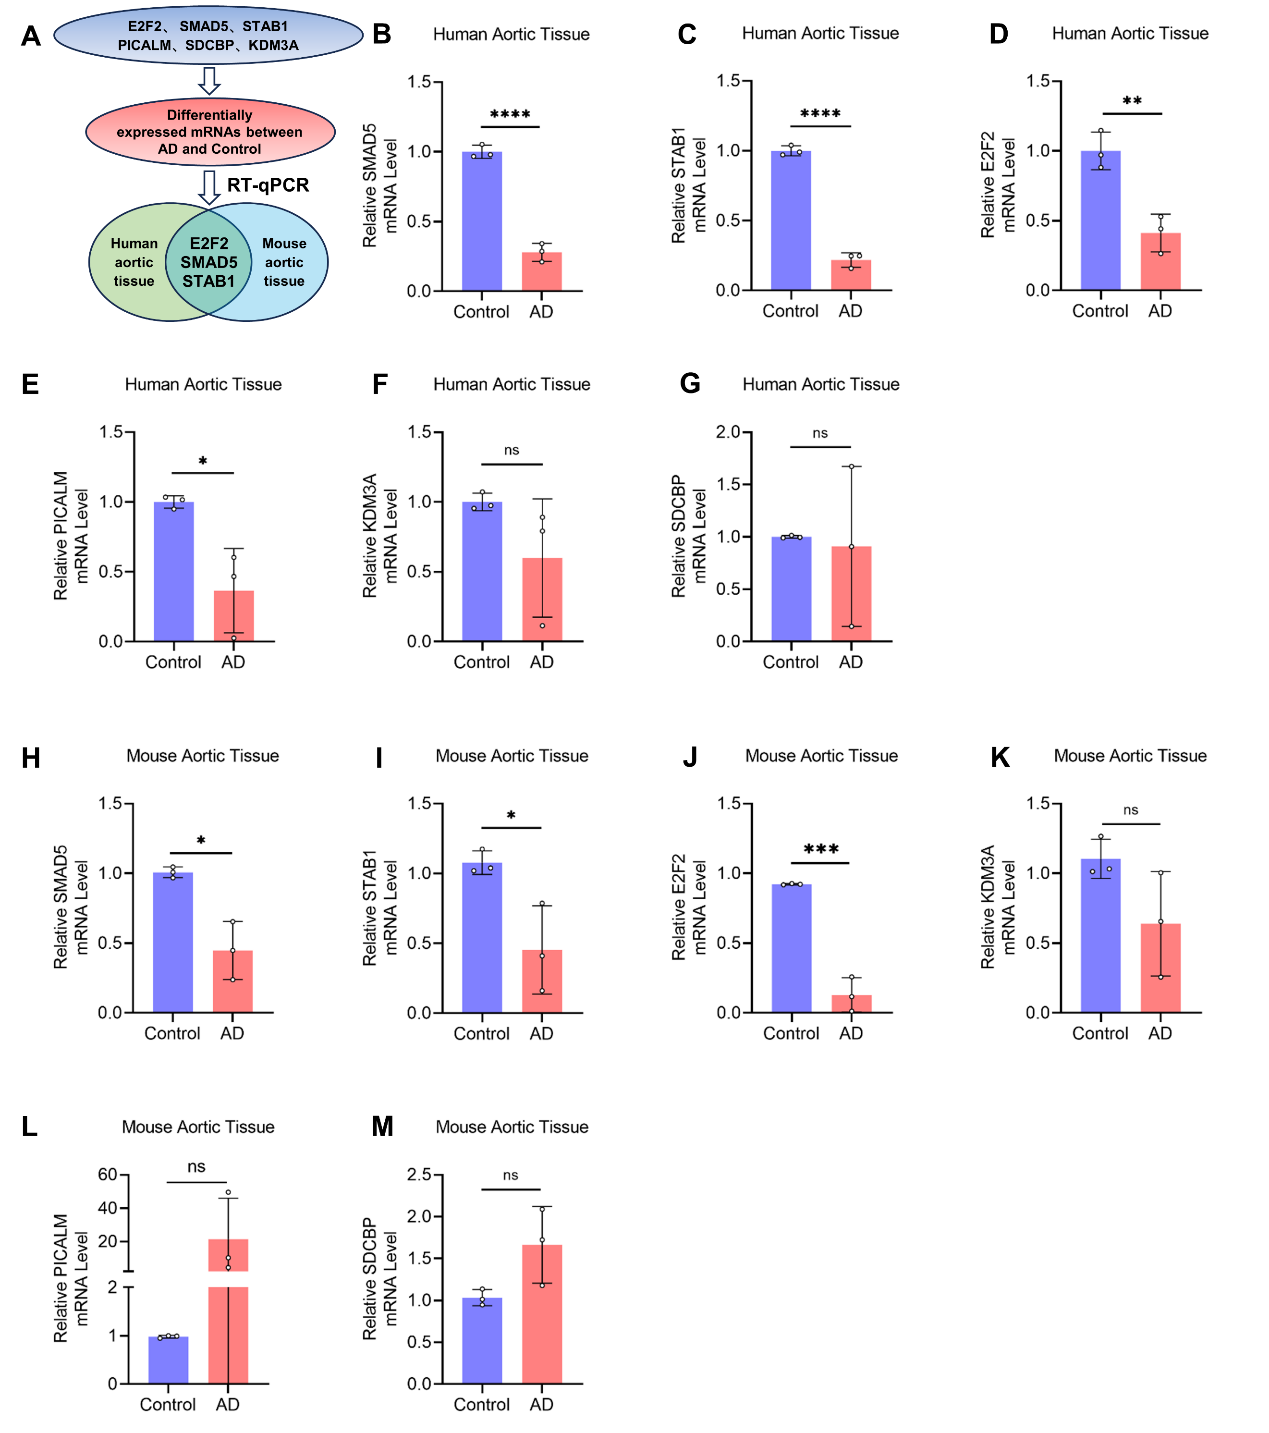


**Fig. S4. Expression of predicted miR-155-5p target genes in human and mouse AD tissues. A.** Diagram illustrating the selection process for miR-155-5p target genes in human and mouse AD samples. **B-G.** qRT-PCR showing mRNA levels of SMAD5 (B), SATB1 (C), E2F2 (D), KDM3A (E), SDCBP (F), and PICALM (G) in human AD tissues compared with controls (n = 3/group). **H-M.** qRT-PCR analysis of mRNA expression of SMAD5 (H), SATB1 (I), E2F2 (J), KDM3A (K), SDCBP (L), and PICALM (M) in mouse AD tissues (n = 3/group).

**Supplemental Fig. 5**


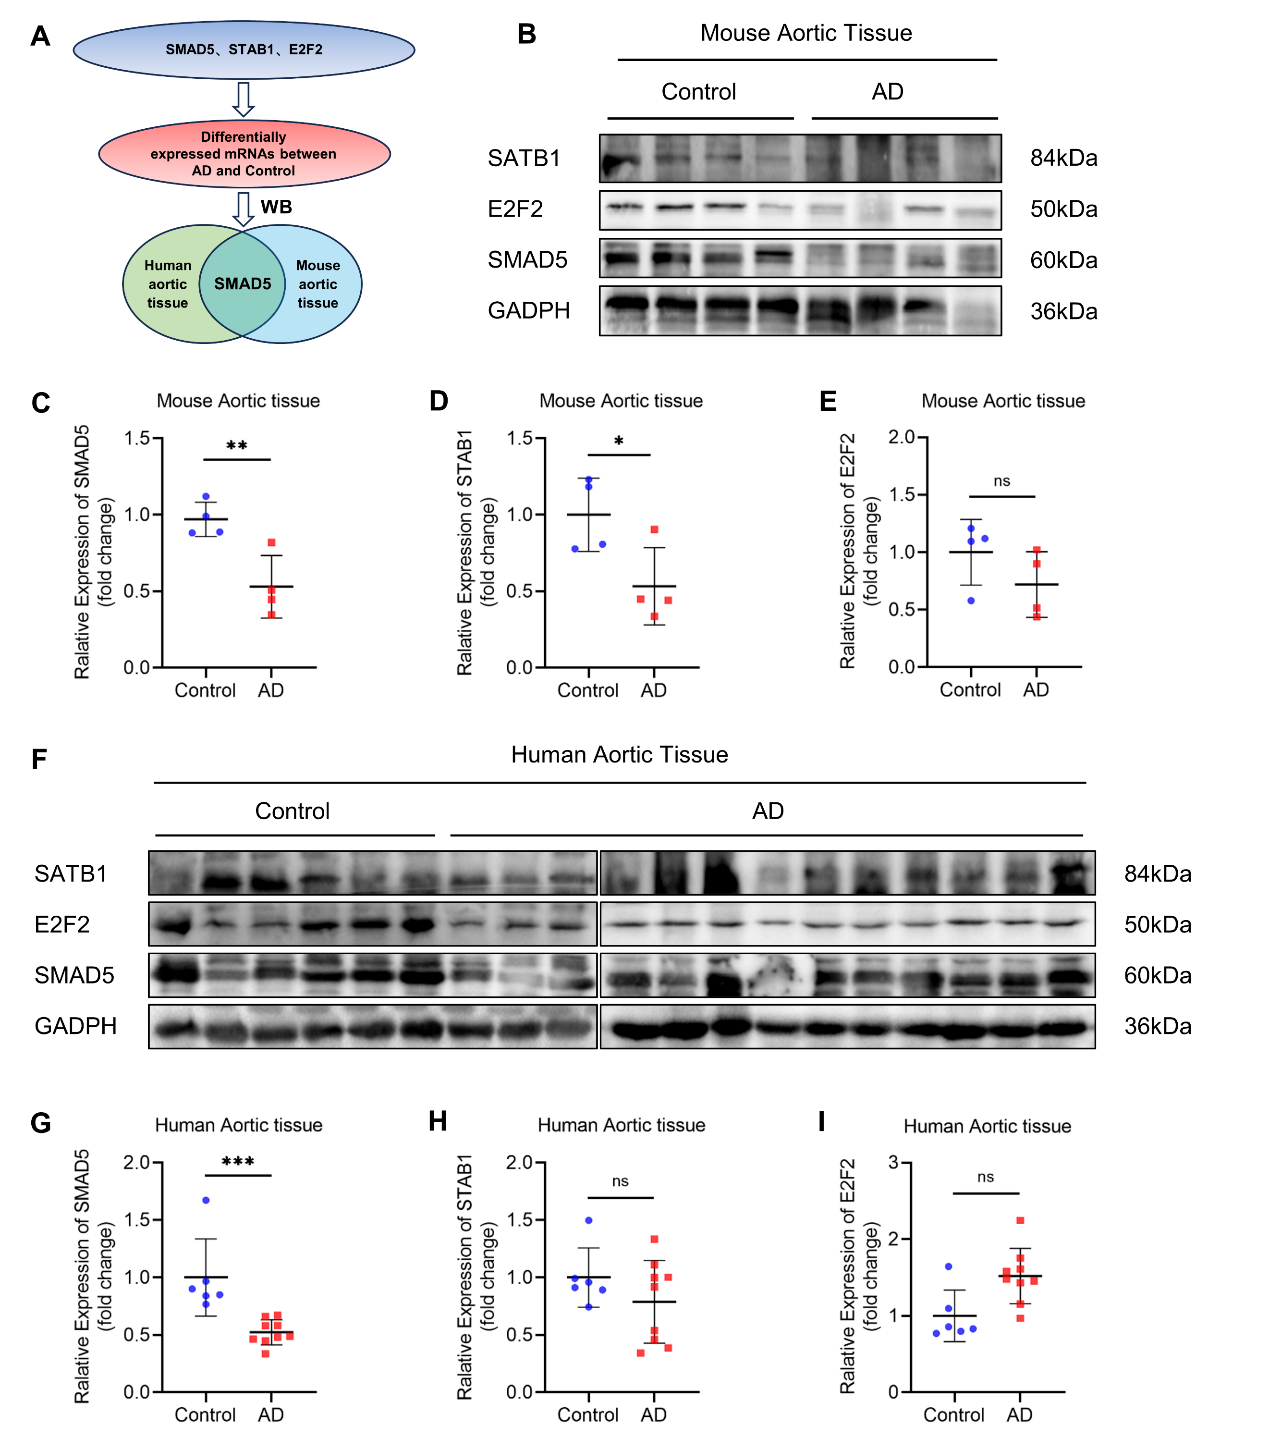


**Fig. S5. Downregulation of SMAD5 protein expression in human and mouse AD tissues. A.** Workflow schematic illustrating target gene identification for miR-155-5p in human and mouse AD samples. **B.** WB analysis of SMAD5, SATB1, and E2F2 proteins in mouse aortic tissues from control and AD groups (n = 4). **C-E.** Quantification of SMAD5 (C), SATB1 (D), and E2F2 (E) protein levels from panel (B). **F.** WB analysis of SMAD5, SATB1, and E2F2 proteins in human aortic tissues (controls: n = 6; AD: n = 13). **G-I.** Quantitative analysis of SMAD5 (G), SATB1 (H), and E2F2 (I) protein expression from panel (F).

**Supplemental Fig. 6**


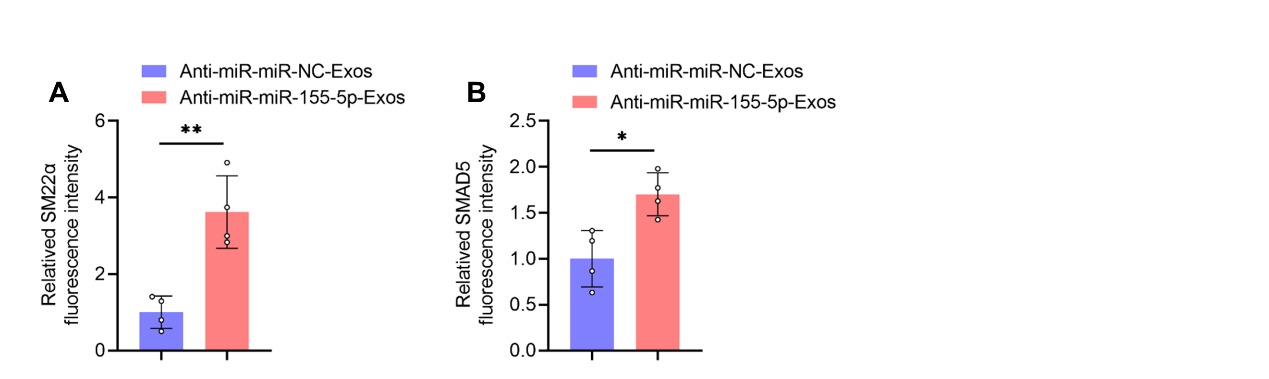


**Fig. S6. Quantitative IF analysis of SM22α and SMAD5 expression.** (A-B) Quantification of SM22α (A) and SMAD5(B) fluorescence intensity based on Fig. 8.
